# Supplementary material
Source: publisher figshare collection journal article supplement (https://sage.figshare.com/ndownloader/files/14676530)
Supplement: Supplementary file 1 [file 14676530]

# Supplemental Material

*Supplemental Table 1. ANOVA table for Tempo*

| Effect                       | $df_n$ | $df_d$ | $F$    | $p$     | $\hat{\eta}^2_G$ |
|------------------------------|--------|--------|--------|---------|------------------|
| Training                     | 2      | 21     | 1.044  | .369    | .039             |
| Valence                      | 1      | 21     | 3.063  | .095    | .018             |
| Arousal                      | 1      | 21     | 35.499 | <.0001* | .310             |
| Training x Valence           | 2      | 21     | 0.055  | .947    | .001             |
| Training x Arousal           | 2      | 21     | 1.469  | .253    | .036             |
| Valence x Arousal            | 1      | 21     | 1.559  | .226    | .014             |
| Training x Valence x Arousal | 2      | 21     | 0.271  | .765    | .005             |

Note: Significance at the level of  $p < .05$  is designated with a \*.

*Supplemental Table 2. ANOVA table for nPVI*

| Effect                       | $df_n$ | $df_d$ | $F$   | $p$   | $\hat{\eta}^2_G$ |
|------------------------------|--------|--------|-------|-------|------------------|
| Training                     | 2      | 21     | 0.842 | .445  | .053             |
| Valence                      | 1      | 21     | 0.105 | .749  | .000             |
| Arousal                      | 1      | 21     | 2.699 | .115  | .017             |
| Training x Valence           | 2      | 21     | 1.792 | .191  | .016             |
| Training x Arousal           | 2      | 21     | 0.058 | .944  | .001             |
| Valence x Arousal            | 1      | 21     | 6.182 | .021* | .021             |
| Training x Valence x Arousal | 2      | 21     | 0.898 | .423  | .006             |

Note: Significance at the level of  $p < .05$  is designated with a \*.

*Supplemental Table 3. ANOVA table for Sound Level (Velocity)*

| Effect                       | $df_n$ | $df_d$ | $F$     | $p$     | $\hat{\eta}^2_G$ |
|------------------------------|--------|--------|---------|---------|------------------|
| Training                     | 2      | 21     | 0.461   | .647    | .026             |
| Valence                      | 1      | 21     | 64.056  | <.0001* | .147             |
| Arousal                      | 1      | 21     | 129.766 | <.0001* | .609             |
| Training x Valence           | 2      | 21     | 1.198   | .321    | .006             |
| Training x Arousal           | 2      | 21     | 0.339   | .716    | .008             |
| Valence x Arousal            | 1      | 21     | 46.260  | <.0001* | .149             |
| Training x Valence x Arousal | 2      | 21     | 1.161   | .332    | .009             |

Note: Significance at the level of  $p < .05$  is designated with a \*.

*Supplemental Table 4. ANOVA table for Articulation*

| Effect                       | $df_n$ | $df_d$ | $F$    | $p$     | $\hat{\eta}^2_G$ |
|------------------------------|--------|--------|--------|---------|------------------|
| Training                     | 2      | 21     | 0.050  | .951    | .003             |
| Valence                      | 1      | 21     | 20.930 | .0001*  | .043             |
| Arousal                      | 1      | 21     | 80.482 | <.0001* | .361             |
| Training x Valence           | 2      | 21     | 1.871  | .179    | .008             |
| Training x Arousal           | 2      | 21     | 0.386  | .684    | .005             |
| Valence x Arousal            | 1      | 21     | 2.413  | .135    | .013             |
| Training x Valence x Arousal | 2      | 21     | 0.240  | .789    | .002             |

Note: Significance at the level of  $p < .05$  is designated with a \*.

Scores for musical excerpts

*Maj 1 (original mode)*

Piano

First system of the Maj 1 (original mode) excerpt. It consists of two staves: a treble staff and a bass staff. The key signature has one flat (B-flat) and the time signature is 4/4. The treble staff contains four measures of music, starting with a whole note chord and followed by eighth notes. The bass staff contains four measures of music, starting with a whole note chord and followed by eighth notes. The music is in a major mode.

4

Second system of the Maj 1 (original mode) excerpt. It consists of two staves: a treble staff and a bass staff. The key signature has one flat (B-flat) and the time signature is 4/4. The treble staff contains four measures of music, starting with a whole note chord and followed by eighth notes. The bass staff contains four measures of music, starting with a whole note chord and followed by eighth notes. The music is in a major mode.

*Min 1(altered mode)*

Piano

First system of the Min 1 (altered mode) excerpt. It consists of two staves: a treble staff and a bass staff. The key signature has three flats (B-flat, E-flat, A-flat) and the time signature is 4/4. The treble staff contains four measures of music, starting with a whole note chord and followed by eighth notes. The bass staff contains four measures of music, starting with a whole note chord and followed by eighth notes. The music is in a minor mode.

4

Second system of the Min 1 (altered mode) excerpt. It consists of two staves: a treble staff and a bass staff. The key signature has three flats (B-flat, E-flat, A-flat) and the time signature is 4/4. The treble staff contains four measures of music, starting with a whole note chord and followed by eighth notes. The bass staff contains four measures of music, starting with a whole note chord and followed by eighth notes. The music is in a minor mode.

*Maj 2 (original mode)*

Piano

First system of music for Maj 2 (original mode). The key signature has one flat (Bb) and the time signature is 4/4. The piano part consists of four measures. The right hand plays a sequence of chords: Bb2 (Bb4, F5), Bb2 (Bb4, F5), Bb2 (Bb4, F5), and Bb2 (Bb4, F5). The left hand plays a sequence of chords: Bb2 (Bb4, F5), Bb2 (Bb4, F5), Bb2 (Bb4, F5), and Bb2 (Bb4, F5).

4

Second system of music for Maj 2 (original mode). The key signature has one flat (Bb) and the time signature is 4/4. The piano part consists of four measures. The right hand plays a sequence of chords: Bb2 (Bb4, F5), Bb2 (Bb4, F5), Bb2 (Bb4, F5), and Bb2 (Bb4, F5). The left hand plays a sequence of chords: Bb2 (Bb4, F5), Bb2 (Bb4, F5), Bb2 (Bb4, F5), and Bb2 (Bb4, F5).

*Min 2 (altered mode)*

Piano

First system of music for Min 2 (altered mode). The key signature has two flats (Bb, Eb) and the time signature is 4/4. The piano part consists of four measures. The right hand plays a sequence of chords: Bb2 (Bb4, F5), Bb2 (Bb4, F5), Bb2 (Bb4, F5), and Bb2 (Bb4, F5). The left hand plays a sequence of chords: Bb2 (Bb4, F5), Bb2 (Bb4, F5), Bb2 (Bb4, F5), and Bb2 (Bb4, F5).

4

Second system of music for Min 2 (altered mode). The key signature has two flats (Bb, Eb) and the time signature is 4/4. The piano part consists of four measures. The right hand plays a sequence of chords: Bb2 (Bb4, F5), Bb2 (Bb4, F5), Bb2 (Bb4, F5), and Bb2 (Bb4, F5). The left hand plays a sequence of chords: Bb2 (Bb4, F5), Bb2 (Bb4, F5), Bb2 (Bb4, F5), and Bb2 (Bb4, F5).

*Maj 3 (altered mode)*

Piano

First system of music for 'Maj 3 (altered mode)'. It consists of two staves: a treble staff and a bass staff. The key signature has one flat (B-flat) and the time signature is 4/4. The first four measures show a sequence of chords. The treble staff contains chords: C4-E4-G4, C4-E4-G4, C4-E4-G4, and C4-E4-G4. The bass staff contains chords: F3-A2-C3, F3-A2-C3, F3-A2-C3, and F3-A2-C3.

4

Second system of music for 'Maj 3 (altered mode)'. It consists of two staves: a treble staff and a bass staff. The key signature has one flat (B-flat) and the time signature is 4/4. The first four measures show a sequence of chords. The treble staff contains chords: C4-E4-G4, C4-E4-G4, C4-E4-G4, and C4-E4-G4. The bass staff contains chords: F3-A2-C3, F3-A2-C3, F3-A2-C3, and F3-A2-C3.

*Min 3 (original mode)*

Piano

First system of music for 'Min 3 (original mode)'. It consists of two staves: a treble staff and a bass staff. The key signature has three flats (B-flat, E-flat, A-flat) and the time signature is 4/4. The first four measures show a sequence of chords. The treble staff contains chords: C4-Eb4-Gb4, C4-Eb4-Gb4, C4-Eb4-Gb4, and C4-Eb4-Gb4. The bass staff contains chords: F3-Ab2-C3, F3-Ab2-C3, F3-Ab2-C3, and F3-Ab2-C3.

4

Second system of music for 'Min 3 (original mode)'. It consists of two staves: a treble staff and a bass staff. The key signature has three flats (B-flat, E-flat, A-flat) and the time signature is 4/4. The first four measures show a sequence of chords. The treble staff contains chords: C4-Eb4-Gb4, C4-Eb4-Gb4, C4-Eb4-Gb4, and C4-Eb4-Gb4. The bass staff contains chords: F3-Ab2-C3, F3-Ab2-C3, F3-Ab2-C3, and F3-Ab2-C3.

*Maj 4 (altered mode)*

Piano

4

This musical score is for a piano piece in 4/4 time, featuring an altered major 4th mode. The key signature has one flat (B-flat). The score is divided into two systems. The first system consists of four measures. The second system, marked with a '4' above the first measure, also consists of four measures and ends with a double bar line. The notation includes treble and bass staves with various chords and melodic lines.

*Min 4 (original mode)*

Piano

4

This musical score is for a piano piece in 4/4 time, featuring the original minor 4th mode. The key signature has three flats (B-flat, E-flat, A-flat). The score is divided into two systems. The first system consists of four measures. The second system, marked with a '4' above the first measure, also consists of four measures and ends with a double bar line. The notation includes treble and bass staves with various chords and melodic lines.

Were there any strategies that you used to communicate different emotions?

### *No Training*

"No."

"Use the high and low notes to the advantage of the emotion being asked to play"

"Thinking about what made me feel those emotion. Recollecting the past"

"Different tempo, loudness"

"Tried thinking about what music provokes these emotions and past memories"

"Sad = slower/louder, Angry = faster/louder, Peaceful = slow/quiet, Happy = loud/fast"

"Previous songs that made me feel the different emotions"

"Control the speed"

### *Low Training*

"I thought about memories with different emotions"

"Loud for angry. Long and soft for sad. Quick and soft for joy."

"Recalling events from past, breathing between each emotion, mindfulness + awareness"

"Use different strength when I press the key"

"Try to remember the scenarios when I feel those emotions"

"Picture a scene in mind and imagining the music is playing in that place"

"Angry was faster shorter notes. Peaceful was longer and slow and same for sad, hence was a bit difficult to play those two. Happy was a mix of fast and slow keys."

"Happy: had played shorter, faster notes. Angry: longer, faster notes played with some force.

Sad: softer, longer notes played. Peaceful: softer, shorter notes."

### *Moderate/High Training*

"The tempo, the duration of the notes, the magnitude of it"

"Close my eyes, imagine the events that I wrote down"

"Imagining movie scenes (as well as their soundtracks) to fit with each emotion"

"Imagining scenarios where I felt those specific emotions"

"Louder/shorter for angry, shorter for happy, long, softer for sad, softer, medium speed for peaceful"

"Tried to speed up specific parts of the excerpt in comparison to others/ play at varying paces throughout. Tried to group certain notes together when playing. Staccato vs. elongated notes; loud vs. quiet/soft"

"Soft/loud tones, quick/slow tones, different rhythms & timing"

"I sustained the notes more for it to match the peaceful and sad emotion. I cut the notes short for angry. I cut and sustained the notes for happy."

## Archived Data

Participants' performance and rating data are available at the following link:

<https://osf.io/zjtm7/>
